# Supplementary material for: Heterogeneous Structural Disturbance of Cell Membrane by Peptides with Modulated Hydrophobic Properties
Source: MDPI journal article supplement (doi:10.3390/pharmaceutics14112471), 2022-11-15
Supplement: s1 [file s1]

## Heterogeneous structural disturbance of cell membrane by peptides with modulated hydrophobic properties

**A**

|          | Amino acid sequence |    |    |    |    |    |    |    |    |    |    |    |    |    |    |    |    |    |    |
|----------|---------------------|----|----|----|----|----|----|----|----|----|----|----|----|----|----|----|----|----|----|
| As-CATH4 | 1                   | 2  | 3  | 4  | 5  | 6  | 7  | 8  | 9  | 10 | 11 | 12 | 13 | 14 | 15 | 16 | 17 | 18 | 19 |
|          | R                   | R  | G  | L  | F  | K  | K  | L  | R  | R  | K  | I  | K  | K  | G  | F  | K  | K  | I  |
|          | 20                  | 21 | 22 | 23 | 24 | 25 | 26 | 27 | 28 | 29 | 30 | 31 | 32 | 33 | 34 | 35 | 36 | 37 | 38 |
|          | F                   | K  | R  | L  | P  | P  | V  | G  | V  | G  | V  | S  | I  | P  | L  | A  | G  | R  | R  |

**B**

|       | Amino acid sequence |   |   |   |   |   |   |   |   |    |    |    |    |    |    |    |    |
|-------|---------------------|---|---|---|---|---|---|---|---|----|----|----|----|----|----|----|----|
|       | 1                   | 2 | 3 | 4 | 5 | 6 | 7 | 8 | 9 | 10 | 11 | 12 | 13 | 14 | 15 | 16 | 17 |
| AS4   | R                   | G | L | F | K | K | L | R | R | K  | I  | K  | K  | G  | F  | K  | K  |
| AS4-1 | R                   | G | L | F | K | K | L | L | R | K  | I  | K  | K  | G  | F  | K  | K  |
| AS4-5 | L                   | G | L | F | K | K | L | L | R | L  | I  | K  | K  | G  | F  | K  | K  |
| AS4-9 | L                   | G | L | F | K | K | L | L | R | L  | I  | L  | K  | G  | F  | K  | L  |

**Figure S1.** Amino acid sequences of the natural peptide As-CATH4 (A), the amino acid 2-18 fragment AS4, and the variants AS4-1, AS4-5, and AS4-9 (B).

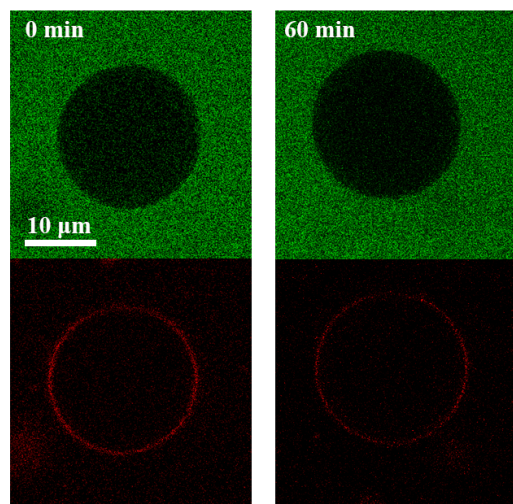

**Figure S2.** Confocal images of a GUV dispersed in calcein solution without peptide addition. The GUV keeps stable without calcein entry under observation.

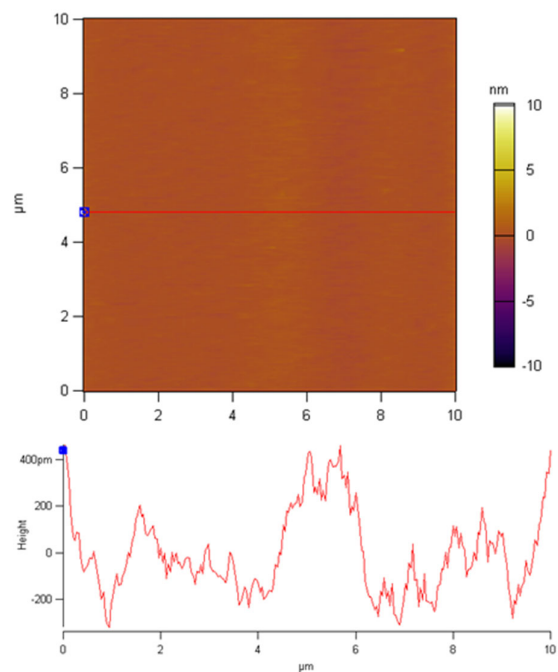

**Figure S3.** AFM image of a pristine SLB before peptide exposure. The orange background refers to SLB surface. Corresponding height profile is shown at the bottom.
